# Supplementary material for: Transcriptome Analysis Identifies the Crosstalk between Dendritic and Natural Killer Cells in Human Cutaneous Leishmaniasis
Source: Microorganisms. 2023 Jul 29;11(8):1937. doi: 10.3390/microorganisms11081937 (PMC10459107; doi:10.3390/microorganisms11081937)
Supplement: Supplementary file 1 [file microorganisms-11-01937-s001.zip]

Archive with 6 entries (6 files):
- Figure S1.pdf
- Table S1 Demographic data.xlsx
- table S2 innate adaptive ILM.xls
- table S3 innate adaptive AGL.xls
- table S4 DC_NK ILM.xls
- table S5 DC_NK AGL.xlsx
