# Supplementary material for: Transcriptome Analysis Identifies the Crosstalk between Dendritic and Natural Killer Cells in Human Cutaneous Leishmaniasis
Source: Microorganisms. 2023 Jul 29;11(8):1937. doi: 10.3390/microorganisms11081937 (PMC10459107; doi:10.3390/microorganisms11081937)
Supplement: Supplementary file 1 [file microorganisms-11-01937-s001.zip › Table S1 Demographic data.xlsx]

## Sheet: Planilha1
CL	Age	gender	Lesion (cm)	Location
1	45	masculino	2.5	stem
2	69	masculino	3	stem
3	33	feminino	3.5	stem
4	21	masculino	1	elbow
5	15	masculino	2	forearm
6	71	masculino	3	foot
7	64	masculino	1	stem
8	57	masculino	5	head
