# Supplementary material for: Transcriptome Analysis Identifies the Crosstalk between Dendritic and Natural Killer Cells in Human Cutaneous Leishmaniasis
Source: Microorganisms. 2023 Jul 29;11(8):1937. doi: 10.3390/microorganisms11081937 (PMC10459107; doi:10.3390/microorganisms11081937)
Supplement: Supplementary file 1 [file microorganisms-11-01937-s001.zip › table S2 innate adaptive ILM.xls]

## Sheet: Sheet0
© 2000-2016 QIAGEN. All rights reserved.
Symbol	Entrez Gene Name	Illumina	Exp Fold Change	Location	Type(s)	Entrez Gene ID for Human	Entrez Gene ID for Mouse	Entrez Gene ID for Rat
CCL3	C-C motif chemokine ligand 3	ILMN_1671509	8,754	Extracellular Space	cytokine	6348
CCL5	C-C motif chemokine ligand 5	ILMN_2098126	27,474	Extracellular Space	cytokine	6352	20304	81780
CCR7	C-C motif chemokine receptor 7	ILMN_1715131	9,781	Plasma Membrane	G-protein coupled receptor	1236	12775	287673
CD4	CD4 molecule	ILMN_1727284	4,408	Plasma Membrane	transmembrane receptor	920	12504	24932
CD40	CD40 molecule	ILMN_1779257	4,056	Plasma Membrane	transmembrane receptor	958	21939	171369
CD80	CD80 molecule	ILMN_1716736	2,751	Plasma Membrane	transmembrane receptor	941	12519	25408
CD83	CD83 molecule	ILMN_2328666	4,287	Plasma Membrane	transmembrane receptor	9308	12522	361226
CD86	CD86 molecule	ILMN_1714602	7,413	Plasma Membrane	transmembrane receptor	942	12524	56822
CSF2	colony stimulating factor 2	ILMN_1661861	2,462	Extracellular Space	cytokine	1437	12981	116630
CXCL8	C-X-C motif chemokine ligand 8	ILMN_2184373	17,509	Extracellular Space	cytokine	3576
HLA-E	major histocompatibility complex, class I, E	ILMN_1765258	3,031	Plasma Membrane	transmembrane receptor	3133	667803|15040	294228
IFNG	interferon, gamma	ILMN_2207291	12,467	Extracellular Space	cytokine	3458	15978	25712
IL6	interleukin 6	ILMN_1699651	7,111	Extracellular Space	cytokine	3569	16193	24498
IL15	interleukin 15	ILMN_2369221	2,173	Extracellular Space	cytokine	3600	16168	25670
IL37	interleukin 37	ILMN_2353936	-9,918	Extracellular Space	cytokine	27178
IL1B	interleukin 1 beta	ILMN_1775501	15,242	Extracellular Space	cytokine	3553	16176	24494
IL1RN	interleukin 1 receptor antagonist	ILMN_1689734	3,811	Extracellular Space	cytokine	3557	16181	60582
TLR1	toll like receptor 1	ILMN_1731048	4,438	Plasma Membrane	transmembrane receptor	7096	21897	305354
TLR4	toll like receptor 4	ILMN_1706217	3,138	Plasma Membrane	transmembrane receptor	7099	21898	29260
TLR6	toll like receptor 6	ILMN_1654560	3,811	Plasma Membrane	transmembrane receptor	10333	21899	305353
TLR7	toll like receptor 7	ILMN_1677827	3,706	Plasma Membrane	transmembrane receptor	51284	170743	317468
TNF	tumor necrosis factor	ILMN_1728106	5,098	Extracellular Space	cytokine	7124	21926	24835
TNFRSF17	tumor necrosis factor receptor superfamily member 17	ILMN_1768016	4,257	Plasma Membrane	transmembrane receptor	608	21935	287034
TNFRSF13B	tumor necrosis factor receptor superfamily member 13B	ILMN_1759075	2,250	Plasma Membrane	transmembrane receptor	23495	57916
TNFSF13B	tumor necrosis factor superfamily member 13b	ILMN_1758418	11,004	Extracellular Space	cytokine	10673	24099	498666
