# Supplementary material for: Transcriptome Analysis Identifies the Crosstalk between Dendritic and Natural Killer Cells in Human Cutaneous Leishmaniasis
Source: Microorganisms. 2023 Jul 29;11(8):1937. doi: 10.3390/microorganisms11081937 (PMC10459107; doi:10.3390/microorganisms11081937)
Supplement: Supplementary file 1 [file microorganisms-11-01937-s001.zip › table S3 innate adaptive AGL.xls]

## Sheet: Sheet0
© 2000-2016 QIAGEN. All rights reserved.
Symbol	Entrez Gene Name	Agilent	Exp Fold Change	Location	Type(s)	Entrez Gene ID for Human	Entrez Gene ID for Mouse	Entrez Gene ID for Rat
CCL3	C-C motif chemokine ligand 3	A_33_P3316273	68,431	Extracellular Space	cytokine	6348
CCL5	C-C motif chemokine ligand 5	A_23_P152838	49,661	Extracellular Space	cytokine	6352	20304	81780
CCR7	C-C motif chemokine receptor 7	A_23_P343398	24,107	Plasma Membrane	G-protein coupled receptor	1236	12775	287673
CD4	CD4 molecule	A_24_P295999	2,395	Plasma Membrane	transmembrane receptor	920	12504	24932
CD40	CD40 molecule	A_33_P3245439	3,716	Plasma Membrane	transmembrane receptor	958	21939	171369
CD80	CD80 molecule	A_24_P320033	23,305	Plasma Membrane	transmembrane receptor	941	12519	25408
CD83	CD83 molecule	A_23_P70670	7,558	Plasma Membrane	transmembrane receptor	9308	12522	361226
CSF2	colony stimulating factor 2	A_23_P133408	15,867	Extracellular Space	cytokine	1437	12981	116630
CXCL8	C-X-C motif chemokine ligand 8	A_32_P87013	9,354	Extracellular Space	cytokine	3576
HLA-E	major histocompatibility complex, class I, E	A_32_P460973	3,906	Plasma Membrane	transmembrane receptor	3133	667803|15040	294228
IFNG	interferon, gamma	A_23_P151294	51,576	Extracellular Space	cytokine	3458	15978	25712
IL4	interleukin 4	A_23_P213706	2,591	Extracellular Space	cytokine	3565	16189	287287
IL6	interleukin 6	A_33_P3407013	4,586	Extracellular Space	cytokine	3569	16193	24498
IL10	interleukin 10	A_23_P126735	13,428	Extracellular Space	cytokine	3586	16153	25325
IL15	interleukin 15	A_23_P29953	6,157	Extracellular Space	cytokine	3600	16168	25670
IL18	interleukin 18	A_23_P104798	-2,699	Extracellular Space	cytokine	3606	16173	29197
IL37	interleukin 37	A_23_P5654	-16,621	Extracellular Space	cytokine	27178
IL12B	interleukin 12B	A_23_P7560	2,654	Extracellular Space	cytokine	3593	16160	64546
IL1B	interleukin 1 beta	A_23_P79518	20,672	Extracellular Space	cytokine	3553	16176	24494
TLR1	toll like receptor 1	A_23_P10873	8,243	Plasma Membrane	transmembrane receptor	7096	21897	305354
TLR2	toll like receptor 2	A_23_P92499	15,720	Plasma Membrane	transmembrane receptor	7097	24088	310553
TLR4	toll like receptor 4	A_32_P66881	5,301	Plasma Membrane	transmembrane receptor	7099	21898	29260
TLR6	toll like receptor 6	A_23_P256561	7,225	Plasma Membrane	transmembrane receptor	10333	21899	305353
TLR7	toll like receptor 7	A_23_P85240	13,178	Plasma Membrane	transmembrane receptor	51284	170743	317468
TNF	tumor necrosis factor	A_23_P376488	7,159	Extracellular Space	cytokine	7124	21926	24835
TNFRSF17	tumor necrosis factor receptor superfamily member 17	A_23_P37736	24,156	Plasma Membrane	transmembrane receptor	608	21935	287034
TNFRSF13B	tumor necrosis factor receptor superfamily member 13B	A_23_P84705	3,491	Plasma Membrane	transmembrane receptor	23495	57916
TNFSF13	tumor necrosis factor superfamily member 13	A_23_P152620	6,380	Extracellular Space	cytokine	8741	69583	287437
TNFSF13B	tumor necrosis factor superfamily member 13b	A_23_P14174	18,812	Extracellular Space	cytokine	10673	24099	498666
