# Supplementary material for: Transcriptome Analysis Identifies the Crosstalk between Dendritic and Natural Killer Cells in Human Cutaneous Leishmaniasis
Source: Microorganisms. 2023 Jul 29;11(8):1937. doi: 10.3390/microorganisms11081937 (PMC10459107; doi:10.3390/microorganisms11081937)
Supplement: Supplementary file 1 [file microorganisms-11-01937-s001.zip › table S4 DC_NK ILM.xls]

## Sheet: Sheet0
© 2000-2016 QIAGEN. All rights reserved.
Symbol	Entrez Gene Name	Illumina	Exp Fold Change	Location	Type(s)	Entrez Gene ID for Human	Entrez Gene ID for Mouse	Entrez Gene ID for Rat
ACTA1	actin, alpha 1, skeletal muscle	ILMN_2125869	-3,758	Cytoplasm	other	58	11459	29437
CCR7	C-C motif chemokine receptor 7	ILMN_1715131	9,781	Plasma Membrane	G-protein coupled receptor	1236	12775	287673
CD40	CD40 molecule	ILMN_1779257	4,056	Plasma Membrane	transmembrane receptor	958	21939	171369
CD80	CD80 molecule	ILMN_1716736	2,751	Plasma Membrane	transmembrane receptor	941	12519	25408
CD83	CD83 molecule	ILMN_2328666	4,287	Plasma Membrane	transmembrane receptor	9308	12522	361226
CD86	CD86 molecule	ILMN_1714602	7,413	Plasma Membrane	transmembrane receptor	942	12524	56822
CD209	CD209 molecule	ILMN_1676372	3,031	Plasma Membrane	other	30835	170780	501797
CSF2	colony stimulating factor 2	ILMN_1661861	2,462	Extracellular Space	cytokine	1437	12981	116630
FAS	Fas cell surface death receptor	ILMN_2319077	2,144	Plasma Membrane	transmembrane receptor	355	14102	246097
FASLG	Fas ligand	ILMN_1781824	3,864	Extracellular Space	cytokine	356	14103	25385
HLA-E	major histocompatibility complex, class I, E	ILMN_1765258	3,031	Plasma Membrane	transmembrane receptor	3133	667803|15040	294228
IFNG	interferon, gamma	ILMN_2207291	12,467	Extracellular Space	cytokine	3458	15978	25712
IL6	interleukin 6	ILMN_1699651	7,111	Extracellular Space	cytokine	3569	16193	24498
IL15	interleukin 15	ILMN_2369221	2,173	Extracellular Space	cytokine	3600	16168	25670
IL15RA	interleukin 15 receptor subunit alpha	ILMN_1665682	3,074	Plasma Membrane	transmembrane receptor	3601	16169	690369
IL2RB	interleukin 2 receptor subunit beta	ILMN_1684349	7,516	Plasma Membrane	transmembrane receptor	3560	16185	25746
IL2RG	interleukin 2 receptor subunit gamma	ILMN_1794386	2,462	Plasma Membrane	transmembrane receptor	3561	16186	140924
TLR4	toll like receptor 4	ILMN_1706217	3,138	Plasma Membrane	transmembrane receptor	7099	21898	29260
TLR7	toll like receptor 7	ILMN_1677827	3,706	Plasma Membrane	transmembrane receptor	51284	170743	317468
TNF	tumor necrosis factor	ILMN_1728106	5,098	Extracellular Space	cytokine	7124	21926	24835
TNFRSF1B	tumor necrosis factor receptor superfamily member 1B	ILMN_1764788	4,823	Plasma Membrane	transmembrane receptor	7133	21938	156767
TNFSF10	tumor necrosis factor superfamily member 10	ILMN_1801307	3,249	Extracellular Space	cytokine	8743	22035	246775
