# Supplementary material for: Transcriptome Analysis Identifies the Crosstalk between Dendritic and Natural Killer Cells in Human Cutaneous Leishmaniasis
Source: Microorganisms. 2023 Jul 29;11(8):1937. doi: 10.3390/microorganisms11081937 (PMC10459107; doi:10.3390/microorganisms11081937)
Supplement: Supplementary file 1 [file microorganisms-11-01937-s001.zip › table S5 DC_NK AGL.xlsx]

## Sheet: Plan1
© 2000-2016 QIAGEN. All rights reserved.
Symbol	Entrez Gene Name	Agilent	Exp Fold Change	Location	Type(s)	Entrez Gene ID for Human	Entrez Gene ID for Mouse	Entrez Gene ID for Rat
ACTB	actin, beta	A_32_P137939	2,388	Cytoplasm	other	60	11461	81822
CAMK2B	calcium/calmodulin dependent protein kinase II beta	A_23_P42882	-7,977	Cytoplasm	kinase	816	12323	24245
CCR7	C-C motif chemokine receptor 7	A_23_P343398	24,107	Plasma Membrane	G-protein coupled receptor	1236	12775	287673
CD40	CD40 molecule	A_33_P3245439	3,716	Plasma Membrane	transmembrane receptor	958	21939	171369
CD80	CD80 molecule	A_24_P320033	23,305	Plasma Membrane	transmembrane receptor	941	12519	25408
CD83	CD83 molecule	A_23_P70670	7,558	Plasma Membrane	transmembrane receptor	9308	12522	361226
CD209	CD209 molecule	A_33_P3272493	3,645	Plasma Membrane	other	30835	170780	501797
CSF2	colony stimulating factor 2	A_23_P133408	15,867	Extracellular Space	cytokine	1437	12981	116630
FAS	Fas cell surface death receptor	A_23_P63896	2,043	Plasma Membrane	transmembrane receptor	355	14102	246097
FASLG	Fas ligand	A_23_P369815	30,392	Extracellular Space	cytokine	356	14103	25385
FSCN1	fascin actin-bundling protein 1	A_33_P3411075	2,476	Cytoplasm	other	6624	14086	683788
HLA-E	major histocompatibility complex, class I, E	A_32_P460973	3,906	Plasma Membrane	transmembrane receptor	3133	667803|15040	294228
IFNG	interferon, gamma	A_23_P151294	51,576	Extracellular Space	cytokine	3458	15978	25712
IL4	interleukin 4	A_23_P213706	2,591	Extracellular Space	cytokine	3565	16189	287287
IL6	interleukin 6	A_33_P3407013	4,586	Extracellular Space	cytokine	3569	16193	24498
IL15	interleukin 15	A_23_P29953	6,157	Extracellular Space	cytokine	3600	16168	25670
IL18	interleukin 18	A_23_P104798	-2,699	Extracellular Space	cytokine	3606	16173	29197
IL12B	interleukin 12B	A_23_P7560	2,654	Extracellular Space	cytokine	3593	16160	64546
IL15RA	interleukin 15 receptor subunit alpha	A_33_P3399263	3,103	Plasma Membrane	transmembrane receptor	3601	16169	690369
IL2RB	interleukin 2 receptor subunit beta	A_24_P203000	14,168	Plasma Membrane	transmembrane receptor	3560	16185	25746
IL2RG	interleukin 2 receptor subunit gamma	A_23_P148473	14,390	Plasma Membrane	transmembrane receptor	3561	16186	140924
KLRC4-KLRK1/KLRK1	killer cell lectin like receptor K1	A_24_P193093	16,211	Plasma Membrane	transmembrane receptor	22914|100528032
TLR4	toll like receptor 4	A_32_P66881	5,301	Plasma Membrane	transmembrane receptor	7099	21898	29260
TLR7	toll like receptor 7	A_23_P85240	13,178	Plasma Membrane	transmembrane receptor	51284	170743	317468
TNF	tumor necrosis factor	A_23_P376488	7,159	Extracellular Space	cytokine	7124	21926	24835
TNFRSF1B	tumor necrosis factor receptor superfamily member 1B	A_33_P3322274	4,005	Plasma Membrane	transmembrane receptor	7133	21938	156767
TNFSF10	tumor necrosis factor superfamily member 10	A_33_P3226810	2,552	Extracellular Space	cytokine	8743	22035	246775
TREM2	triggering receptor expressed on myeloid cells 2	A_24_P12397	19,712	Plasma Membrane	transmembrane receptor	54209	83433
